# Supplementary material for: Multiple polymerase gene mutations for human adaptation occurring in Asian H5N1 influenza virus clinical isolates
Source: PubMed Central journal article supplement (PMC6117316; doi:10.1038/s41598-018-31397-3), 2018-08-30
Supplement: 41598_2018_31397_MOESM1_ESM.pdf [file 41598_2018_31397_MOESM1_ESM.pdf]

Supplementary Information for

**Multiple polymerase gene mutations for human adaptation occurring in Asian H5N1 influenza virus clinical isolates**

Yasuha Arai<sup>a,b</sup>, Norihito Kawashita<sup>c,d</sup>, Kozue Hotta<sup>e,f</sup>, Phuong Vu Mai Hoang<sup>g</sup>, Hang Le Khanh Nguyen<sup>g</sup>, Thach Co Nguyen<sup>g</sup>, Cuong Duc Vuong<sup>g</sup>, Thanh Thi Le<sup>g</sup>, Mai Thi Quynh Le<sup>g</sup>, Kosuke Soda<sup>h</sup>, Madiha S. Ibrahim<sup>i</sup>, Tomo Daidoji<sup>a</sup>, Tatsuya Takagi<sup>d</sup>, Tatsuo Shioda<sup>b</sup>, Takaaki Nakaya<sup>a</sup>, Toshihiro Ito<sup>h</sup>, Futoshi Hasebe<sup>e</sup>, Yohei Watanabe<sup>a,b</sup>

<sup>a</sup>Department of Infectious Diseases, Graduate School of Medicine, Kyoto Prefectural University of Medicine, Kyoto, Japan, <sup>b</sup>Department of Viral Infections, Research Institute for Microbial Diseases, Osaka University, Osaka, Japan, <sup>c</sup>Graduate School of Science and Engineering, Kindai University, Osaka, Japan, <sup>d</sup>Graduate School of Pharmaceutical Science, Osaka University, Osaka, Japan, <sup>e</sup>Vietnam Research Station, Center for Infectious Disease Research in Asia and Africa, Institute of Tropical Medicine, Nagasaki University, Hanoi, Vietnam, <sup>f</sup>Laboratory of Veterinary Public Health, Department of Veterinary Medical Sciences, Graduate School of Agricultural and Life Science, The University of Tokyo, Tokyo, Japan, <sup>g</sup>Department of Virology, National Institute of Hygiene and Epidemiology, Hanoi, Vietnam, <sup>h</sup>Avian Zoonosis Research Center, Faculty of Agriculture, Tottori University, Tottori, Japan, <sup>i</sup>Department of Microbiology and Immunology, Faculty of Veterinary Medicine, Damanhour University, Damanhour, Egypt

Address corresponding to Yohei Watanabe, nabe@koto.kpu-m.ac.jp

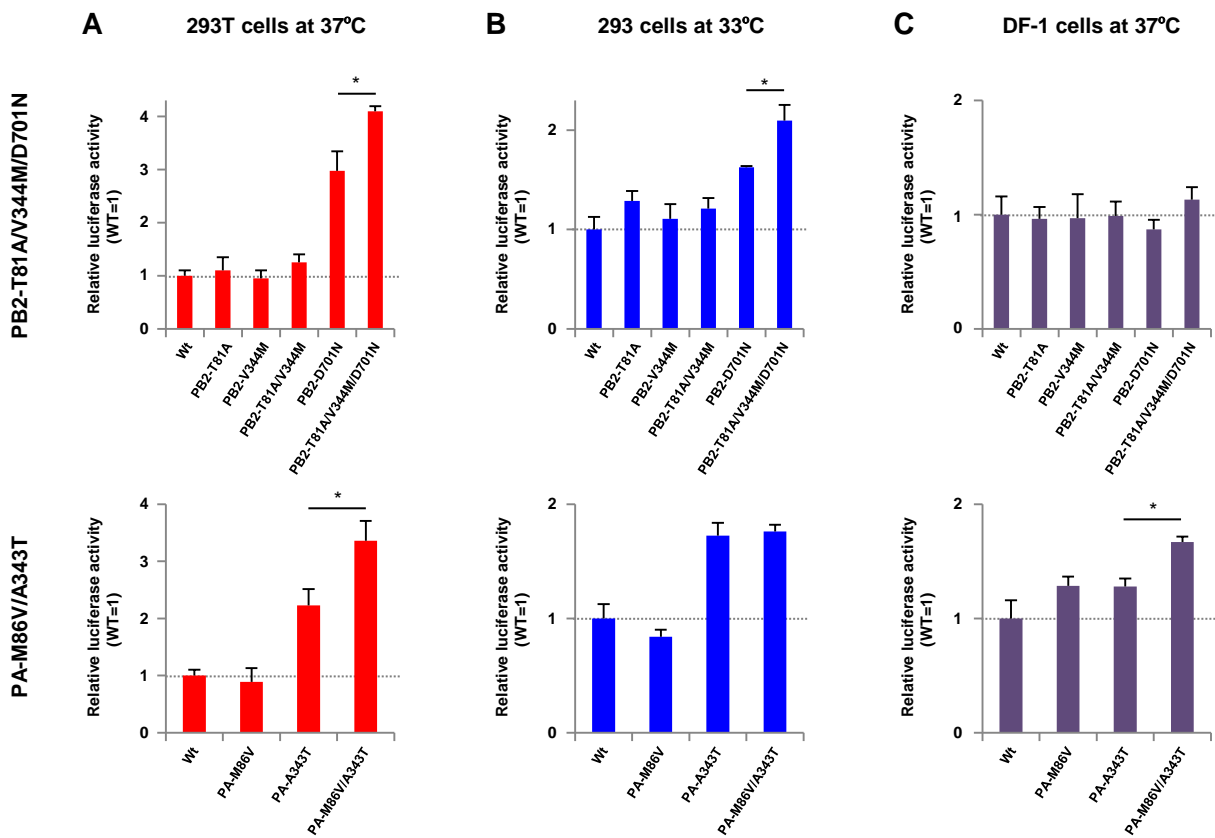

**Fig. S1. Synergistic effect of multiple mutations on polymerase activity.** To clarify the significance of the PB2-T81A/V344M/D701N and PA-M86V/A343T multiple mutations on polymerase activity, the polymerase activity data of the indicated VN/HN mutants (Fig. 1) were compared. (A) 293T cells at 37°C. (B) 293T cells at 33°C. (C) QT-6 cells at 37°C. An asterisk indicates a  $P$  value  $< 0.01$  (ANOVA with Tukey's multiple comparison test).

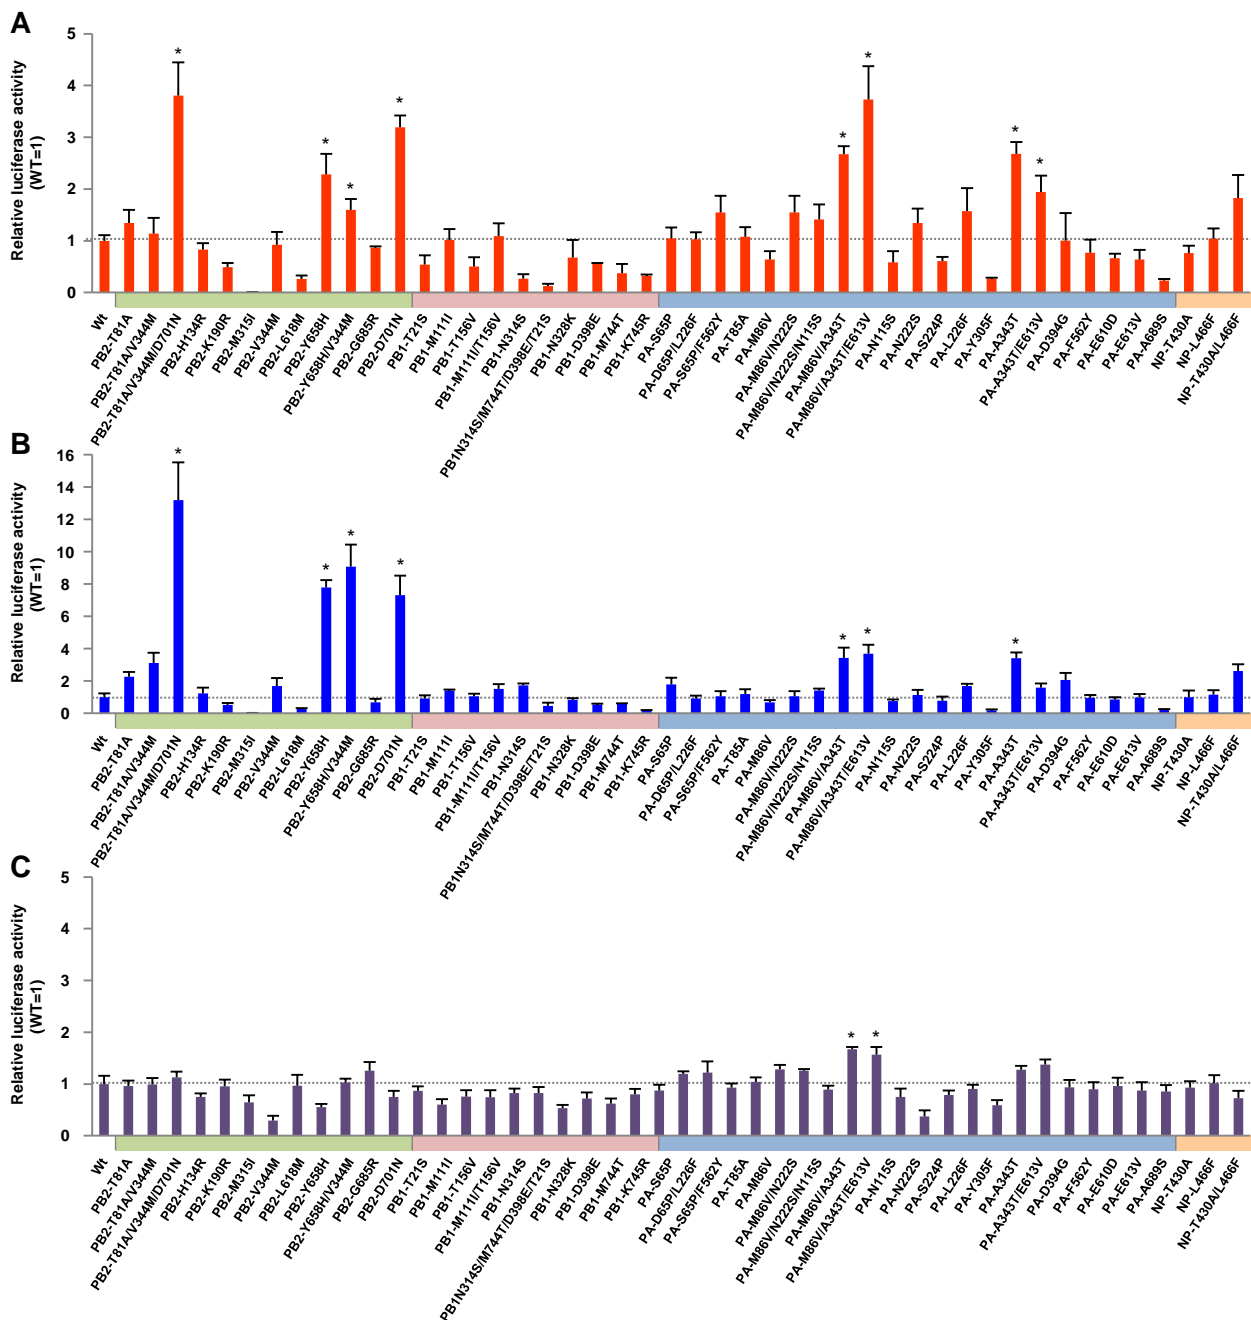

**Fig. S2. Effect of mutations on H5N1 clade 2.2.1 virus polymerase activity..** Human 293T cells and avian DF-1 cells were transfected with plasmids expressing EG/D1 PB2, PB1, PA or NP with the indicated single or multiple mutations, a human or chicken polymerase I-driven plasmid expressing a vRNA-oriented luciferase reporter gene, and a plasmid expressing *Renilla* luciferase as an internal control. After 48 h incubation at 33 or 37°C, luciferase activities were measured, normalized to the internal *Renilla* luciferase activity, and expressed relative to the results for VN/HN (wt). (A) EG/D1 polymerase activity at 37°C in 293T cells. (B) EG/D1 polymerase activity at 33°C in 293T cells. (C) EG/D1 polymerase activity at 37 °C in DF-1 cells. Colors on each x-axis indicate the different virus genes. An asterisk indicates a *P* value < 0.01 (ANOVA with Tukey's multiple comparison test). Asterisks for mutations with negative effects on polymerase activity were omitted for clarity.

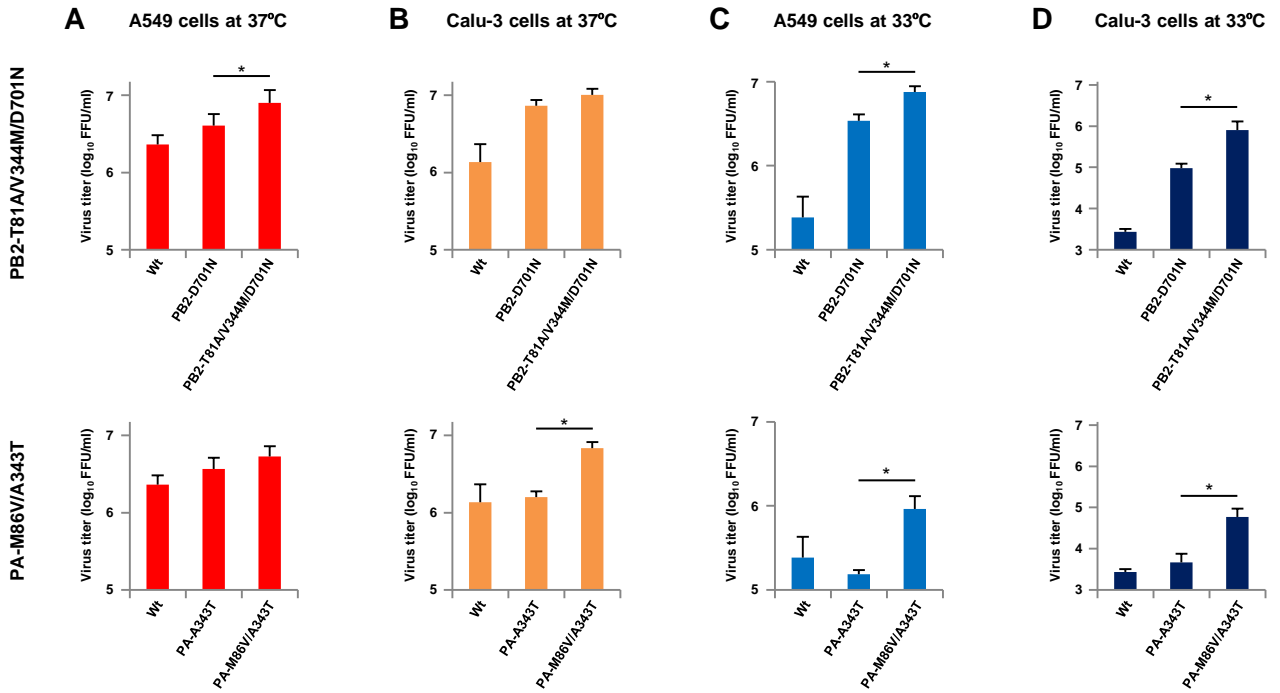

**Fig. S3. Synergistic effect of multiple mutations on viral replication in human airway epithelial cells.** To clarify the significance of the PB2-T81A/V344M/D701N and PA-M86V/A343T multiple mutations in viral replication, virus titer data at 48 or 72 h post-infection for the indicated VN/HN mutants (Fig. 2) were compared. (A) A549 cells at 37°C. (B) Calu-3 cells at 37°C. (C) A549 cells at 33°C. (D) Calu-3 cells at 33°C. An asterisk indicates a  $P$  value  $< 0.01$  (ANOVA with Tukey's multiple comparison test).

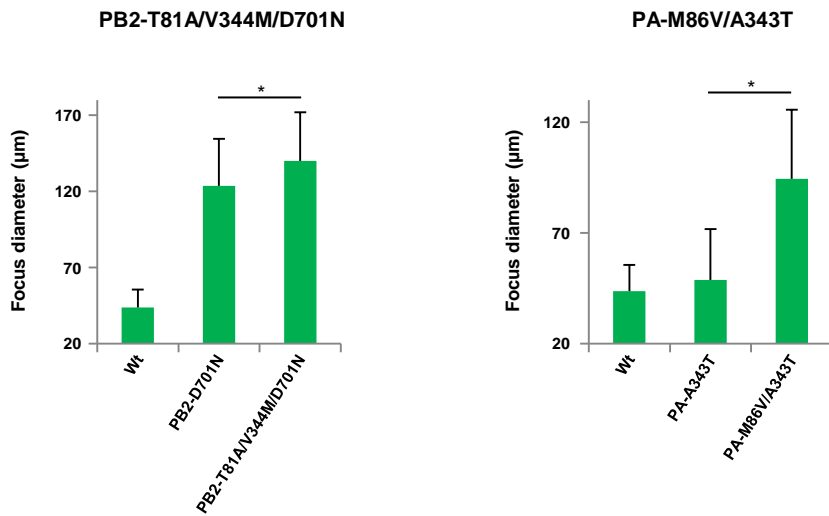

**Fig. S4. Synergistic effect of multiple mutations on foci sizes.** To clarify the significance of the PB2-T81A/V344M/D701N and PA-M86V/A343T multiple mutations on foci sizes, foci size data for the indicated VN/HN mutants (Fig. 4) were compared. An asterisk indicates a  $P$  value  $< 0.01$  (ANOVA with Tukey's multiple comparison test).

**Table S1. Mutations in the polymerase sequence of 24 H5N1 viruses isolated from patients in Asia and identified by an NCBI database search.**

| Clade   | Virus Strain             | Subtype | Passage history <sup>†</sup> | Collection date | Mutation in gene       |                        |                   |             |
|---------|--------------------------|---------|------------------------------|-----------------|------------------------|------------------------|-------------------|-------------|
|         |                          |         |                              |                 | PB2                    | PB1                    | PA                | NP          |
| 2.3.2.1 | A/Guangxi/1/2009         | H5N1    | E1                           | 2009-01-19      |                        | M111I/N328K            | L226F             |             |
| 2.3.2.1 | A/Hong Kong/6841/2010    | H5N1    | -                            | 2010-11-16      | G685R                  |                        | N115S             |             |
| 2.3.2.1 | A/Hubei/1/2010           | H5N1    | E1                           | 2010-05-21      |                        |                        |                   |             |
| 2.3.4   | A/Guangdong/1/2008       | H5N1    | E2                           | 2008-02-16      | T81A/V344M             |                        |                   |             |
| 2.3.4   | A/Guangxi/1/2008         | H5N1    | E2                           | 2008-02-12      | M315I/L618M            | M111I/T156V/K745R      | L226F             |             |
| 2.3.4   | A/Hunan/1/2008           | H5N1    | E2                           | 2008-01-16      | T81A/K190R/V344M/D701N |                        | A343T/E613V/A689S |             |
| 2.3.4   | A/Shandong/1/2009        | H5N1    | E1                           | 2009-01-05      | T81A/V344M             | N328K                  | D394G             |             |
| 2.3.4   | A/Xinjiang/1/2009        | H5N1    | E2                           | 2009-01-10      |                        |                        | N222S/F562Y       |             |
| 2.3.4.1 | A/Guizhou/1/2009         | H5N1    | E2                           | 2009-01-15      | Y658H                  | T21S/N314S/D398E/M744T | N115S/N222S       | T430A/L466F |
| 2.3.4.1 | A/Hunan/1/2009           | H5N1    | E3                           | 2009-01-08      | K190R/Y658H            |                        | T85A/Y305F        |             |
| 2.3.4.1 | A/Hunan/2/2009           | H5N1    | E2                           | 2009-01-23      | V344M/Y658H            | T21S/N314S/D398E/M744T |                   | T430A/L466F |
| 2.3.4   | A/Beijing/1/2009         | H5N1    | E3                           | 2008-12-04      |                        |                        | T85A/Y305F        |             |
| 2.3.4.3 | A/Vietnam/HN31432M/2008  | H5N1    | C2                           | 2008-02-21      |                        |                        | D394G/F562Y       |             |
| 2.3.4.3 | A/Vietnam/UT31394II/2008 | H5N1    | C2                           | 2008-01-17      | M315I/L618M            | M111I/T156V/K745R      |                   |             |
| 2.3.4.3 | A/Vietnam/UT31412II/2008 | H5N1    | C2                           | 2008-02-09      | L618M                  | K745R                  | A343T/E613V/A689S | T430A       |
| 2.3.4.3 | A/Vietnam/UT31413II/2008 | H5N1    | C2                           | 2008-02-13      | L618M                  | K745R                  | A343T/E613V       |             |
| 1.1     | A/Cambodia/S1211394/2008 | H5N1    | -                            | 2008-12-11      | G685R                  |                        | A343T/E613V       |             |
| 1.1     | A/Cambodia/U0417030/2010 | H5N1    | -                            | 2010-04-18      |                        |                        | D394G             |             |
| 1.1     | A/Cambodia/V0203306/2011 | H5N1    | -                            | 2011-02-03      |                        |                        |                   |             |
| 1.1     | A/Cambodia/V0219301/2011 | H5N1    | -                            | 2011-02-17      |                        |                        |                   |             |
| 1.1     | A/Cambodia/V0401301/2011 | H5N1    | -                            | 2011-03-31      |                        |                        | S224P             |             |
| 1.1     | A/Cambodia/V0417301/2011 | H5N1    | -                            | 2011-04-16      |                        |                        |                   |             |
| 1.1     | A/Cambodia/V0606311/2011 | H5N1    | -                            | 2011-06-06      |                        |                        | S224P             |             |
| 1.1     | A/Cambodia/W0112303/2012 | H5N1    | -                            | 2012-01-10      | D701N                  |                        |                   |             |

<sup>†</sup> C, cultured cells; E, eggs. The number after each letter indicates the number of passages of the strain.

- No information
